# Supplementary material for: Magnetic nanoprobes for rapid detection of copper ion in aqueous environment by surface-enhanced Raman spectroscopy
Source: PubMed Central journal article supplement — RSC Adv. 2022 Jan 4;12(2):921–8. doi: 10.1039/d1ra07482b (PMC8978930; doi:10.1039/d1ra07482b), 2022-01-04
Supplement: RA-012-D1RA07482B-s001.pdf [file RA-012-D1RA07482B-s001.pdf]

## Supplementary Information

### SERS-activated Magnetic Nanoprobes for Rapid Detection of Copper Ion in Aqueous Environment

by

Min-Ying Hsieh<sup>a</sup>, Po-Jung Huang<sup>a\*</sup>

<sup>a</sup>Institute of Environmental Engineering, National San Yat-sen University, Kaohsiung 80424, Taiwan

\* corresponding author

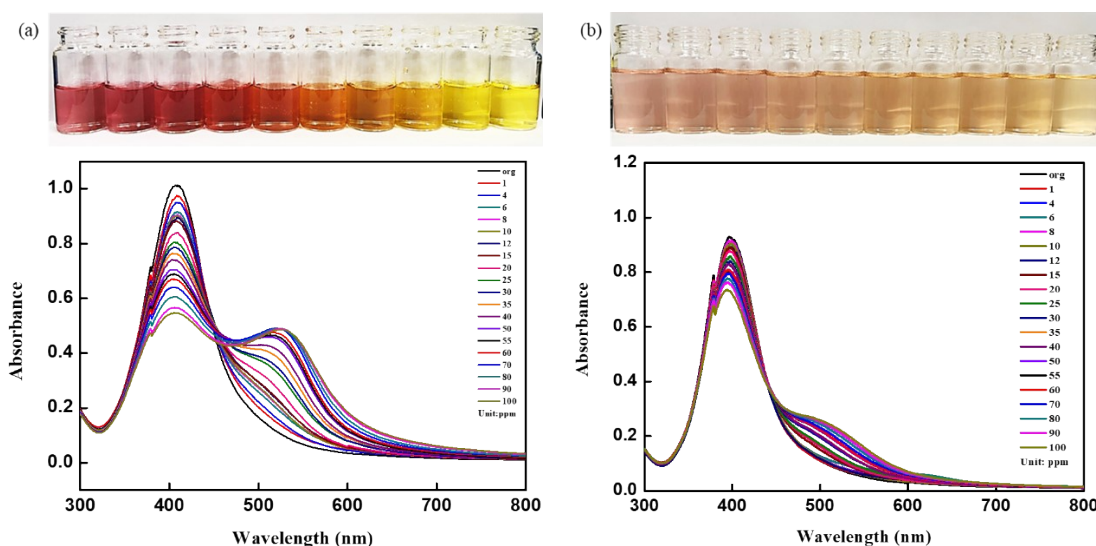

Figure S1 The steric effect of modifier of AgNPs for copper ion detection. (a) photographs and UV spectrum using 4MBA@Ag probes for sensing different concentration of copper ion; (b) photographs and UV spectrum using 2TSA@Ag probes for sensing different concentration of copper ion

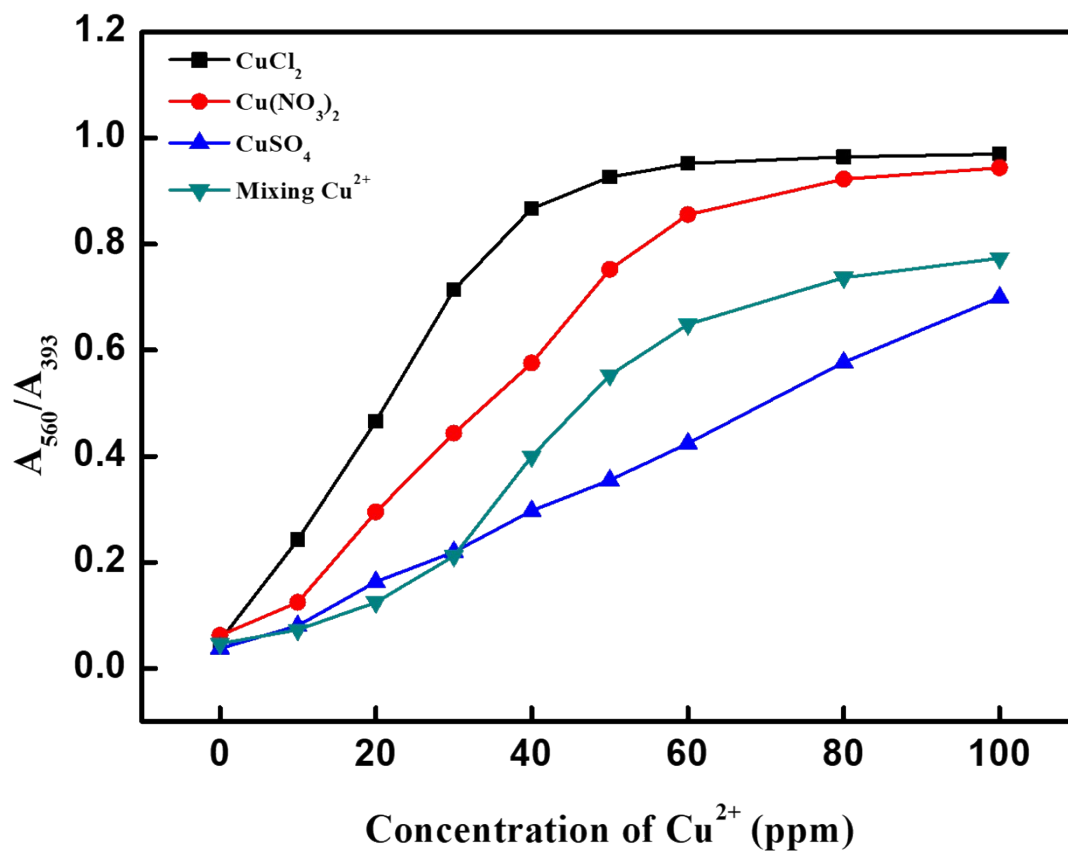

Figure S2 Plot of the  $A_{560}/A_{393}$  absorbance ratios of 4MBA@Ag solutions versus the concentrations of  $\text{Cu}^{2+}$  from different salts (chloride, nitrate, sulfate and mixed)
